# Supplementary material for: Magmatic Material in Sandstone Shows Prospects for New Diamond Deposits within the Northern East European Platform
Source: MDPI journal article supplement (doi:10.3390/min11040339), 2021-03-25
Supplement: s1 [file s1]

Supplementary material for

# Magmatic Material in Sandstone Shows Prospects for New Diamond Deposits within the Northern East European Platform

Elena Agasheva \*

Sobolev Institute of Geology and Mineralogy, Siberian Branch of the Russian Academy of Sciences, 630090 Novosibirsk, Russia

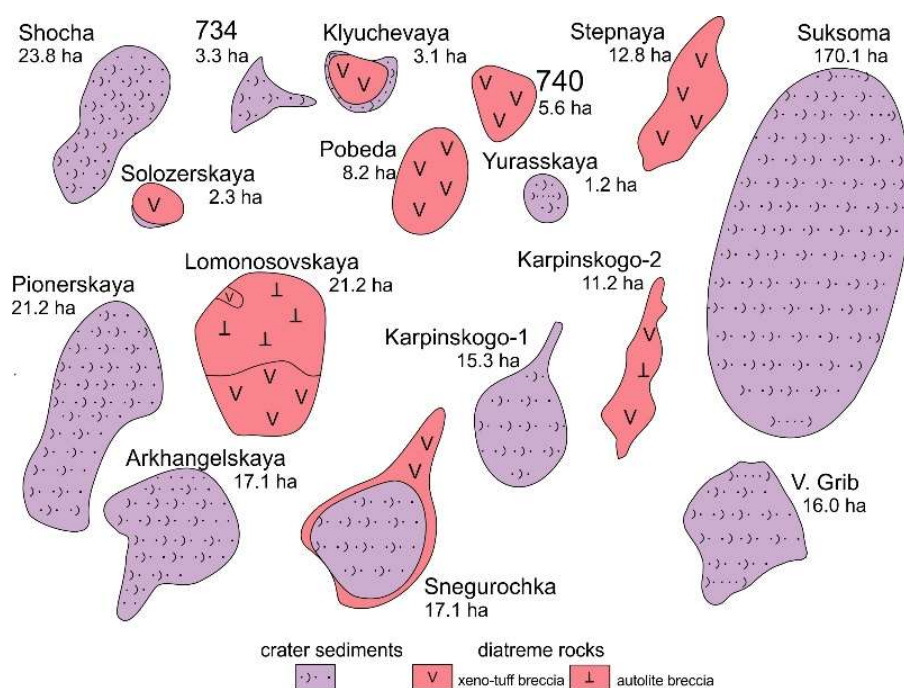

**Figure. S1.** Variety of the ADP pipe shapes in plan view and areal extent at the erosional surface. adapted from [2,3,16]

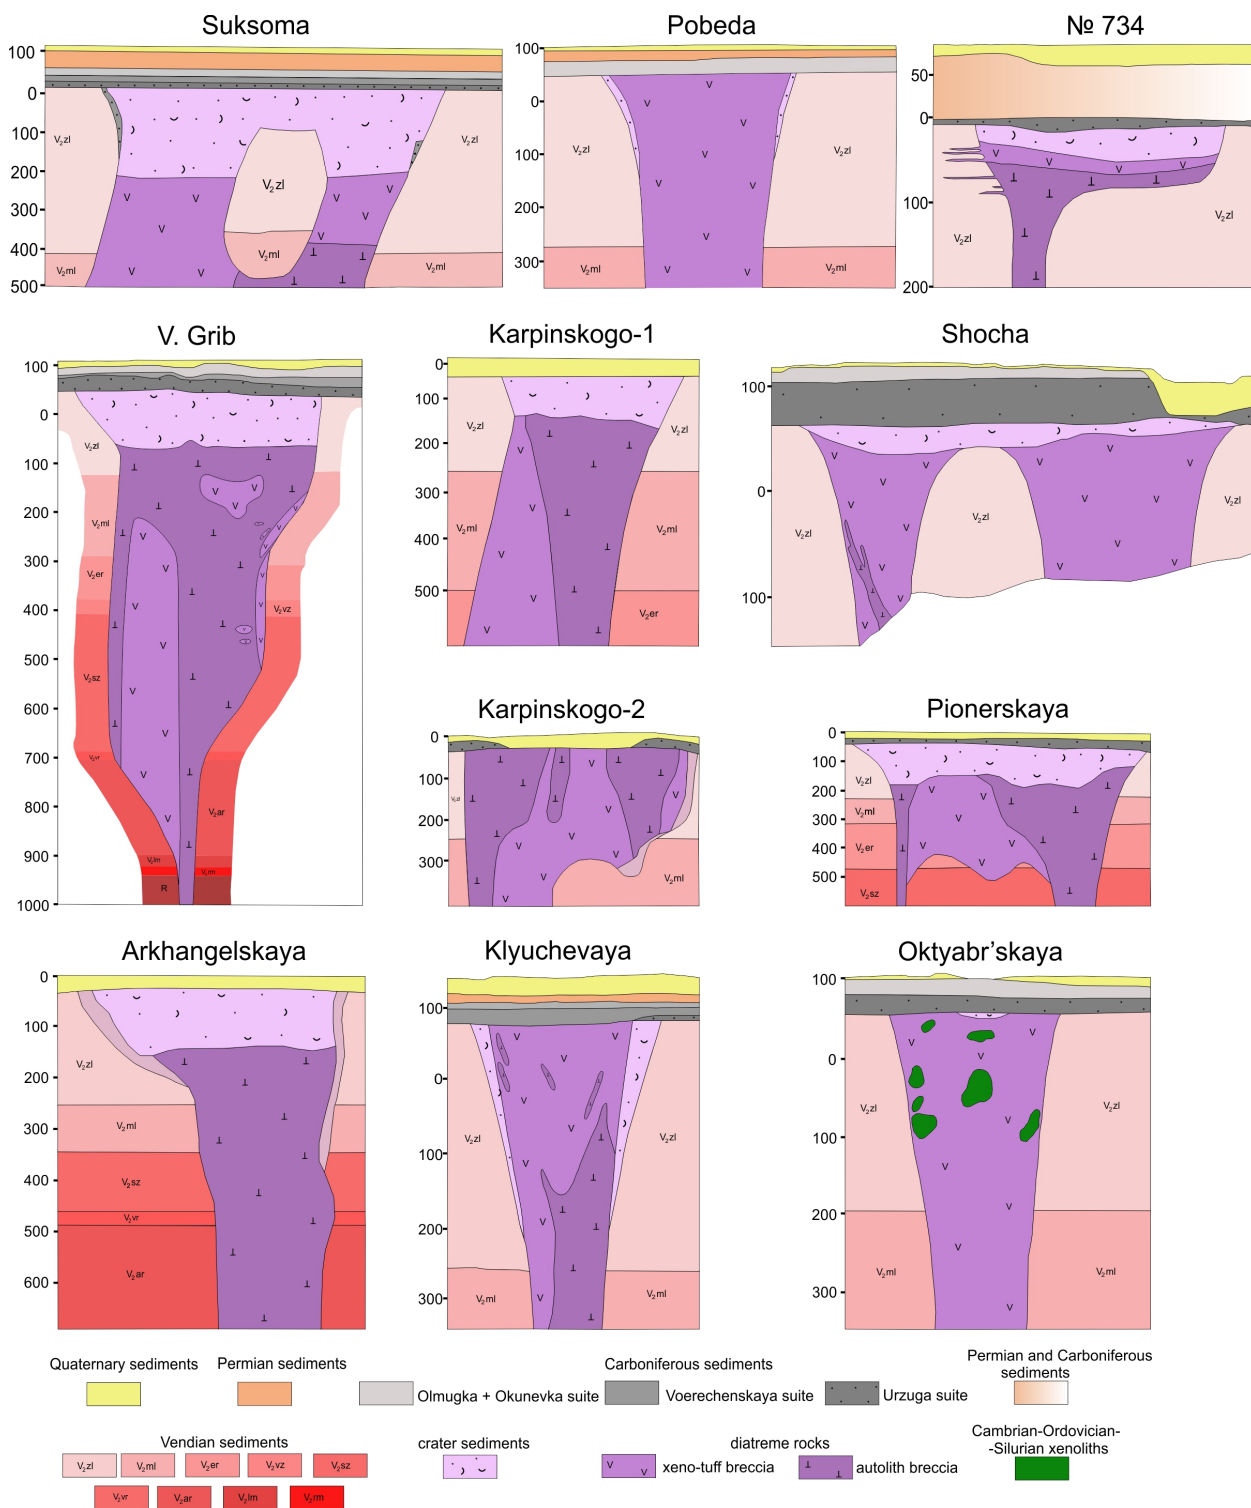

**Figure S2.** Schematic sections of the typical ADP magmatic pipes. adapted from [3,16,17]

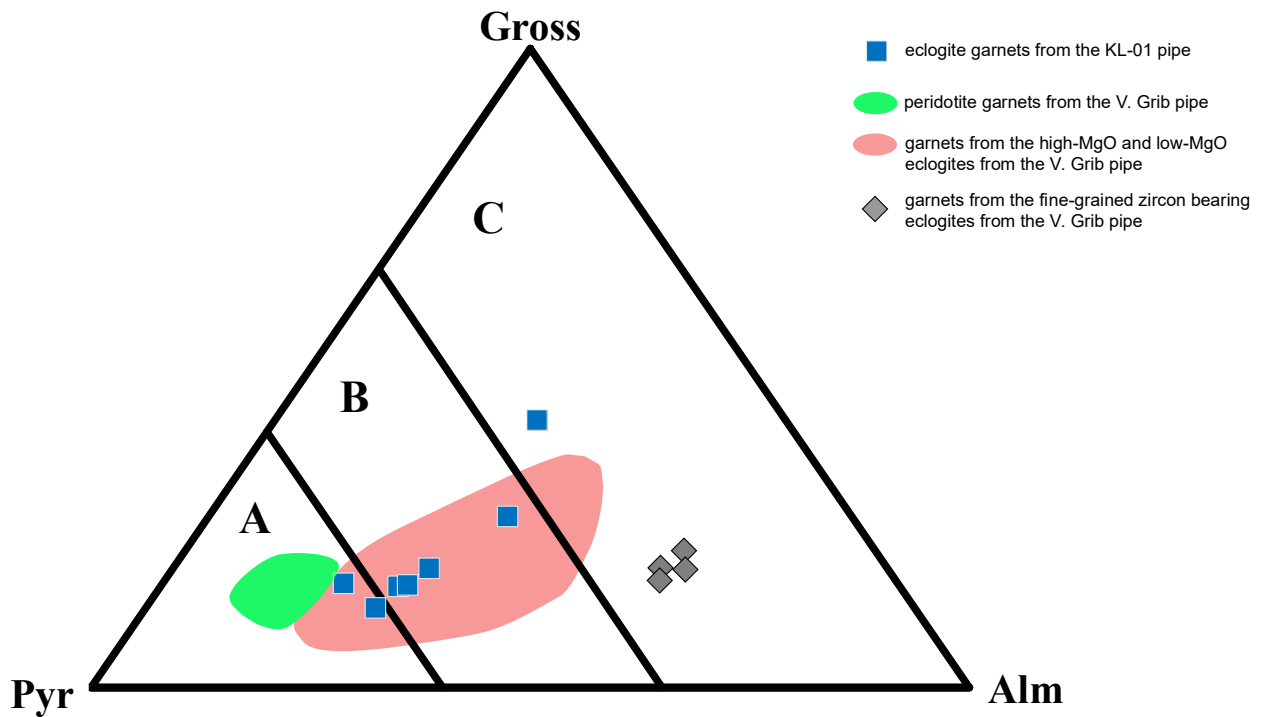

**Figure S3.** Ca-Fe-Mg (mol. %) diagram for garnet (according to [6]); A, B, C groups according to [4] classification; Pyr – pyrope, Gross – grossular, Alm – almandine. The V. Grib pipe high-MgO and low-MgO eclogites [18] fine-grained zircon bearing eclogites [19].

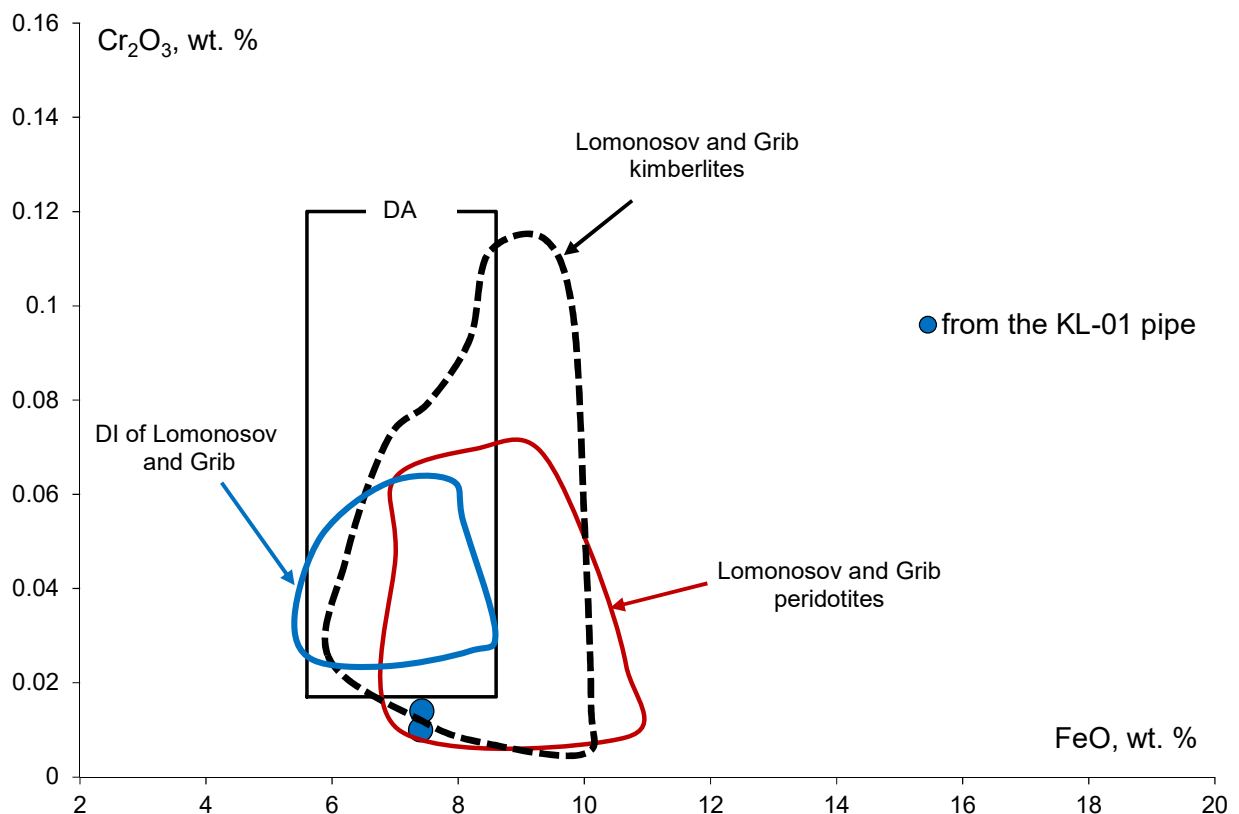

**Figure S4.** Position of the KL-01 pipe olivines on the  $\text{Cr}_2\text{O}_3$ –FeO diagram. DA, diamond association [15], Lomonosov and Grib kimberlites and peridotites [1,10,11,13] DI (inclusion in diamonds) from the Lomonosov and Grib [1,7].

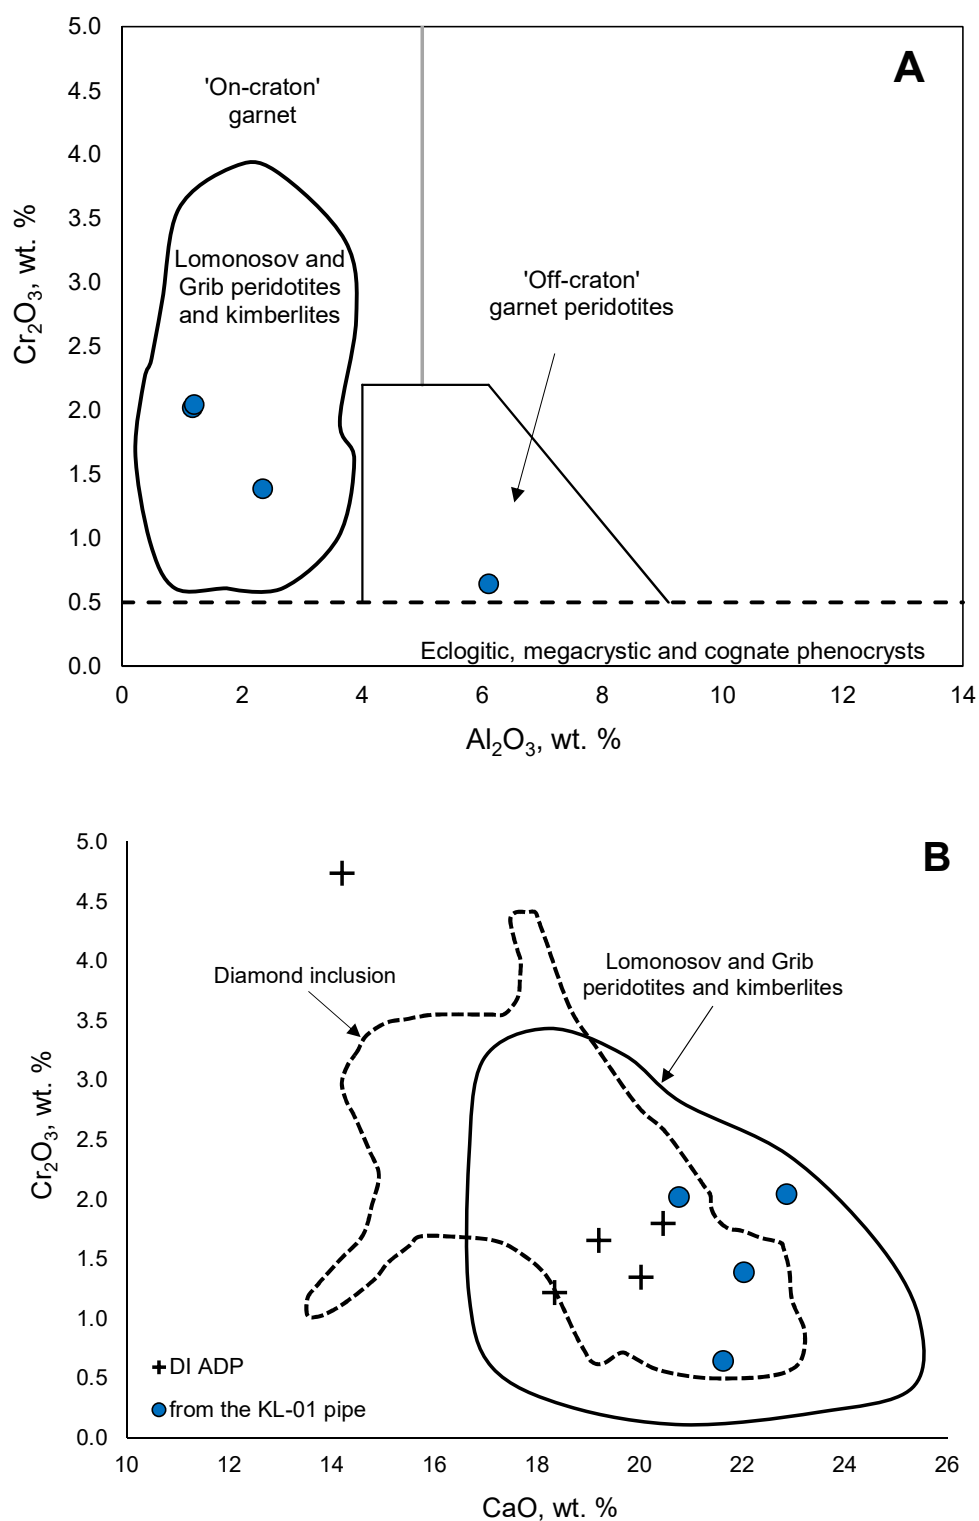

**Figure S5** Major element composition of Cr-diopside xenocrysts from the KL-01 pipe. (A) Cr<sub>2</sub>O<sub>3</sub>–Al<sub>2</sub>O<sub>3</sub> diagram [9]; (B) Cr<sub>2</sub>O<sub>3</sub>–CaO diagram. Lomonosov and Grib kimberlites and peridotites [1,10,12,13], diamond inclusion field [5], DI (inclusion in diamonds) from the ADP [1].

## Reference

1. Bogatkov, O.A., Garanin, V.K., Kononova, V.A., Kudryavceva, G.P., Vasil'eva, E.R., Verzhak, V.V., Verichev, E.M., Parsadanyan, K.S., Posuhova, T.V., 1999. Arkhangelsk Diamondiferous Province; Moscow State University: Moscow, Russia, 521p, ISBN 5-211-02558-X. (In Russian)
2. Garanin, K.V. Alkaline ultramafic magmatites of the Zimny Bereg: their potential diamond content and prospects for industrial development. Ph.D Thesis, M.V. Lomonosov Moscow State University, 2004 (in Russian).

3. Golovin, N.N. Geological structure, mineral composition and formation conditions of alkaline-ultra-basic rocks of the Kepino field (Arkhangelsk diamondiferous province). Ph.D Thesis, M.V. Lomonosov Moscow State University, 2003 (in Russian).
4. Coleman, R.G., Lee, D.E., Beatty, L.B., Brannock, W.W., 1965. Eclogites and eclogites; their differences and similarities. *Geol SocAmBull* 76(5), 483–508.
5. Fipke, C.E., Gurney, J.J., Moore, R.O., Nassichuk, W.W., 1989. The Development of Advanced Technology to Distinguish between Diamondiferous and Barren Diatremes; Open File 2124; Geological Survey of Canada: Ottawa, ON, Canada, 1175p.
6. Grew, E.S., Locock, A.J., Mills, S.J., Galuskina, I.O., Galuskin, E.V., Halenius, U., 2013. Nomenclature of the garnet supergroup. *Am Mineral* 98, 785–811.
7. Malkovets, V.G., Zedgenizov, D.A., Sobolev, N.V., Kuzmin, D.V., Gibsher, A.A., Shchukina, E.V., Golovin, N.N., Verichev, E.M., Pokhilenko, N.P., 2011. Contents of trace elements in olivines from diamonds and peridotite xenoliths of the V. Grib kimberlite pipe (Arkhangelsk diamondiferous province, Russia). *Dokl. Earth Sci.* 436, 219–223.
8. Ryan, C.G., Griffin, W.L., Pearson, N.J., 1996. Garnet geotherms: Pressure-temperature data from Cr-pyrope garnet xenocrysts in volcanic rocks. *J. Geophys. Res.* 101, 5611–5625.
9. Ramsay, R.R., Tompkins, L.A., 1994. The geology, heavy mineral concentrate mineralogy, and diamond prospectivity of Boa Esperanca and Cana Verde pipes, Corrego D'anta, Minas Gerais, Brazil. In *Kimberlites, Related Rocks and Mantle Xenoliths, Proceedings of the 5th International Kimberlite Conference, Araxa, Brazil, 18 June–4 July 1991*; Meyer, H.O.A., Leonardos, O.H., Eds.; CPRM Spec. Publ.: Brasilia, Brazil, pp. 329–345.
10. Sablukov, S.M., Sablukova, L.I., Shavyrina, M.V., 2000. Mantle xenoliths from the Zimnii Bereg kimberlite deposits of rounded diamonds, Arkhangelsk diamondiferous province. *Petrologia* 8, 518–548.
11. Sazonova, L.V., Nosova, A.A., Kargin, A.V., Borisovskiy, S.E., Tretyachenko, V.V., Abazova, Z.M., Griban, Y.G., 2015. Olivine from the Pionerskaya and V. Grib kimberlite pipes, Arkhangelsk diamond province, Russia: Types, composition, and origin. *Petrology* 23, 227–258.
12. Shchukina, E.V., Golovin, N.N., Malkovets, V.G., Pokhilenko, N.P., 2012. Mineralogy and equilibrium P-T estimates for peridotite assemblages from the V. Grib kimberlite pipe (Arkhangelsk Kimberlite Province). *Dokl. Earth Sci.* 444, 776–781.
13. Shchukina, E.V., Agashev, A.M., Kostrovitsky, S.I., Pokhilenko, N.P., 2015. Metasomatic processes in the lithospheric mantle beneath the V. Grib kimberlite pipe (Arkhangelsk diamondiferous province). *Russ. Geol. Geophys.* 56, 1701–1716.
14. Shpilevaya, D.V. Geological structure, mineral composition, and environmental aspects of the development of the Arkhangelskaya pipe (the M.V. Lomonosov diamond deposit). Ph.D. Thesis, M.V. Lomonosov Moscow State University, 2008 (in Russian).
15. Sobolev, N.V., Shvedenkov, G.Y., Korolyuk, V.N., Yefimova, E.S., Pokhilenko, N.P., Strehletov, A.N., Vashchenko, A.N., 1989. Nitrogen in chromite and olivine coexisting with diamond. *Dokl. Akademii Nauk USSR* 309, 697–701.
16. Verichev, E.M. Geological conditions of formation and exploration of the V. Grib deposit. Ph.D Thesis, M.V. Lomonosov Moscow State University, 2002 (in Russian).
17. Shpilyaeva, D.V. Geological Structure, Mineral Composition, and Environmental Aspects of the Development of the Arkhangelskaya Pipe (the M.V. Lomonosov Diamond Deposit). Ph.D. Thesis, M.V. Lomonosov Moscow State University, Moscow, Russia, 2008. (In Russian)
18. Shchukina, E.V.; Agashev, A.M.; Soloshenko, N.G.; Streletskaia, M.V.; Zedgenizov, D.A. Origin of V. Grib pipe eclogites (Arkhangelsk region, NW Russia): Geochemistry, Sm-Nd and Rb-Sr isotopes and relation to regional Precambrian tectonics. *Mineral. Petrol.* 2019, 113, 593–612.
19. Agashev, A.M.; Serov, I.V.; Tolstov, A.V.; Shchukina, E.V.; Ragozin, A.L.; Pokhilenko, N.P. New genetic classification of lithospheric mantle garnets. In *Proceedings of the 5th Russian Scientific and Practical Conference “Efficiency of Geological Exploration for Diamonds: Prospects, Resource, Methodology and Innovative-Technological Aspects”*, Mirny, Russia, 29 May–1 June 2018; pp. 338–342. (In Russian)
